# Supplementary material for: The Effect of Heat Treatment after Hydrothermal Reaction on the Lithium Storage Performance of a MoS2/Carbon Cloth Composite
Source: MDPI journal article supplement (doi:10.3390/ma16247678), 2023-12-17
Supplement: s1 [file s1]

## **Supporting Information**

# **The Effect of Heat Treatment after Hydrothermal Reaction on the Lithium Storage Performance of a MoS<sub>2</sub>/Carbon Cloth Composite**

**Xintong Li, Chonggui Li \* and Qi Yang**

School of Materials Science and Engineering, Shanghai University of Engineering Science, Shanghai 201620, China

\* Correspondence: [chongguili@sues.edu.cn](mailto:chongguili@sues.edu.cn)

**Table S1.** Centre, FWHM and percentage area (area%) for the deconvoluted peaks of Mo 3d.

| Peak & Identity                       | Centre<br>(eV) | FWHM<br>(eV) | Area<br>% |
|---------------------------------------|----------------|--------------|-----------|
| S 2s                                  | 226.78         | 2.00         | 14.81     |
| Mo 3d <sub>5/2</sub> Mo <sup>4+</sup> | 229.61         | 1.24         | 47.23     |
| Mo 3d <sub>3/2</sub> Mo <sup>4+</sup> | 232.76         | 1.24         | 32.60     |
| Mo 3d <sub>5/2</sub> Mo <sup>6+</sup> | 230.98         | 1.26         | 3.17      |
| Mo 3d <sub>3/2</sub> Mo <sup>6+</sup> | 234.03         | 1.26         | 2.19      |

**Table S2.** Centre, FWHM and percentage area (area%) for the deconvoluted peaks of S 2p.

| Peak & Identity     | Centre<br>(eV) | FWHM<br>(eV) | Area<br>% |
|---------------------|----------------|--------------|-----------|
| S 2p <sub>3/2</sub> | 162.40         | 1.11         | 66.19     |
| S 2p <sub>1/2</sub> | 163.59         | 1.11         | 33.81     |

**Table S3.** Centre, FWHM and percentage area (area%) for the deconvoluted peaks of C 1s.

| Peak & Identity | Centre<br>(eV) | FWHM<br>(eV) | Area<br>% |
|-----------------|----------------|--------------|-----------|
| C-C             | 284.80         | 1.26         | 88.23     |
| C-O             | 285.77         | 1.26         | 11.77     |
